# Supplementary material for: Osthole improves function of periodontitis periodontal ligament stem cells via epigenetic modification in cell sheets engineering
Source: PubMed Central journal article supplement (PMC5507976; doi:10.1038/s41598-017-05762-7), 2017-07-12
Supplement: 41598_2017_5762_MOESM1_ESM.pdf [file 41598_2017_5762_MOESM1_ESM.pdf]

# Osthole improves function of periodontitis periodontal ligament stem cells via epigenetic modification in cell sheets engineering

Jin Sun, Zhiwei Dong, Yang Zhang, Xiaoning He, Dongdong Fei, Fang  
Jin, Lin Yuan, Bei Li, Yan Jin

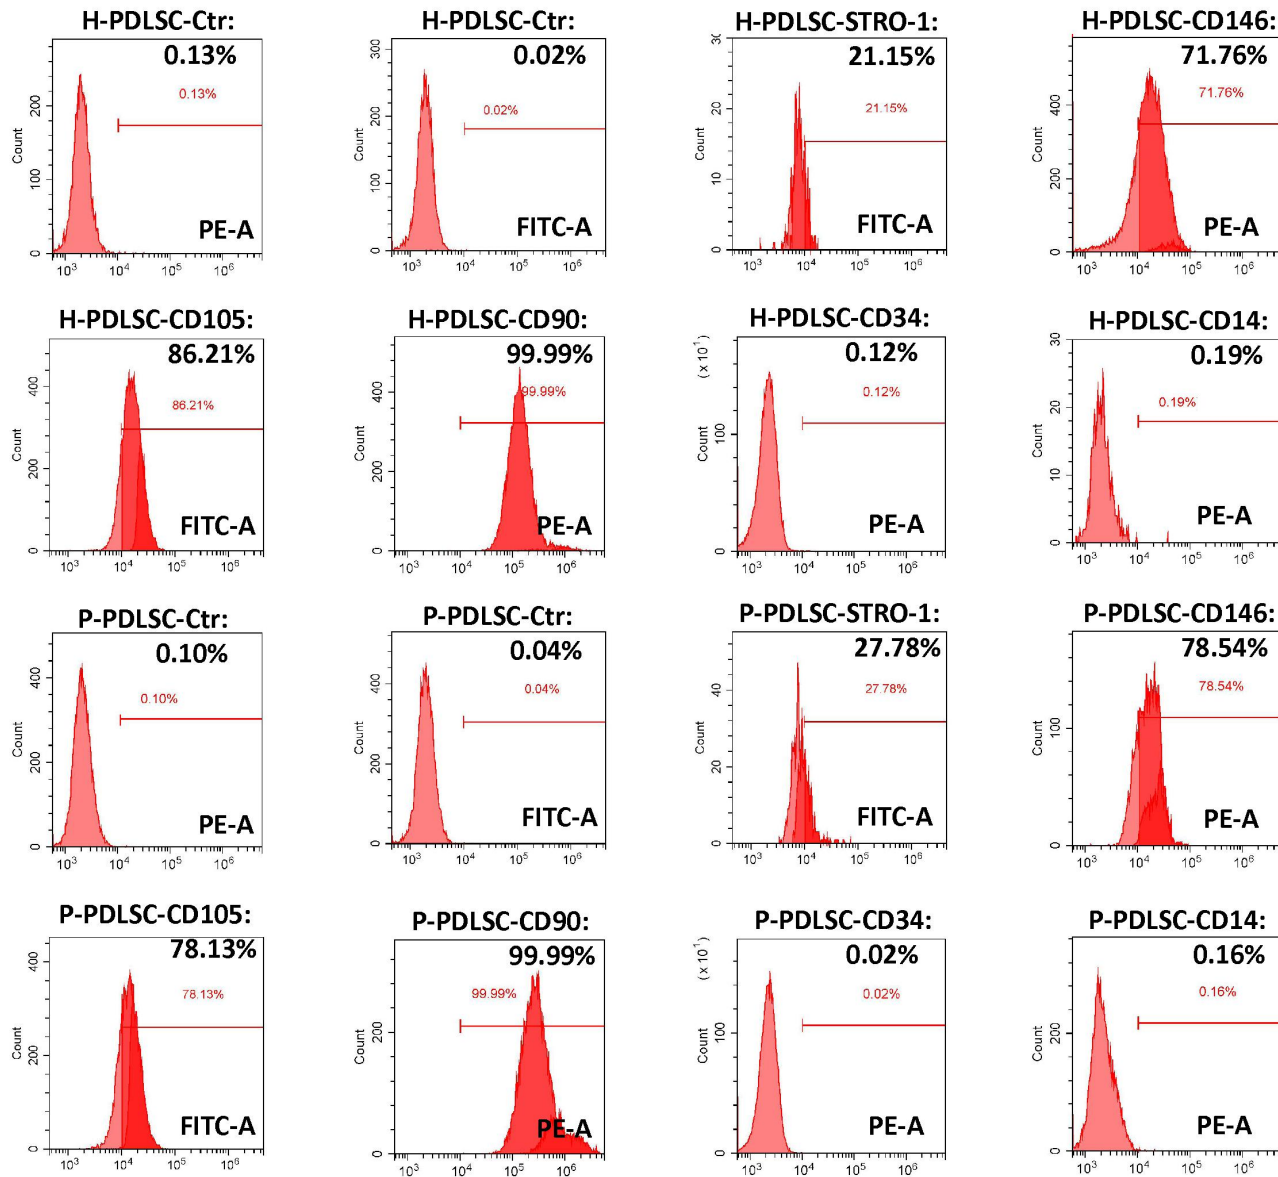

Supplementary figure 1

Flow cytometry analysis of MSC-markers. Analyses were performed via flow cytometry detecting PE or FITC conjugated monoclonal antibodies for human Stro-1, CD146, CD105, CD90, CD34, CD 14 or isotype matched control IgGs. Ctr: control.

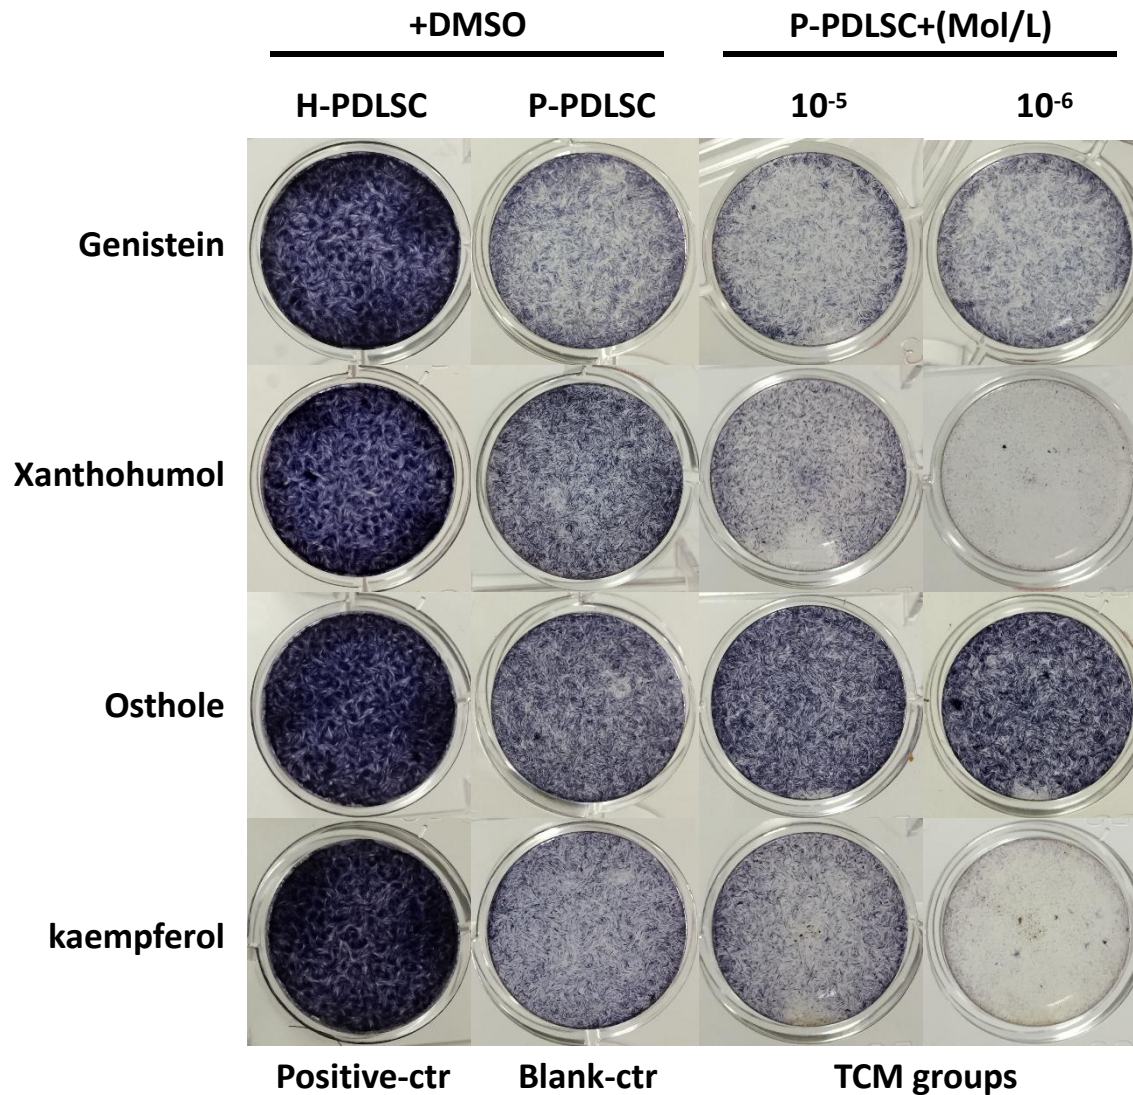

Supplementary figure 2

Osteogenic effect of TCMs on P-PDLSCs. First panel showed cells with Genistein treatment. Second panel showed cells with Xanthohumol treatment. Third panel showed cells with Osthole treatment. Fourth panel showed cells with Kaempferol treatment. Positive-ctr: positive control group, Blank-ctr: blank control.

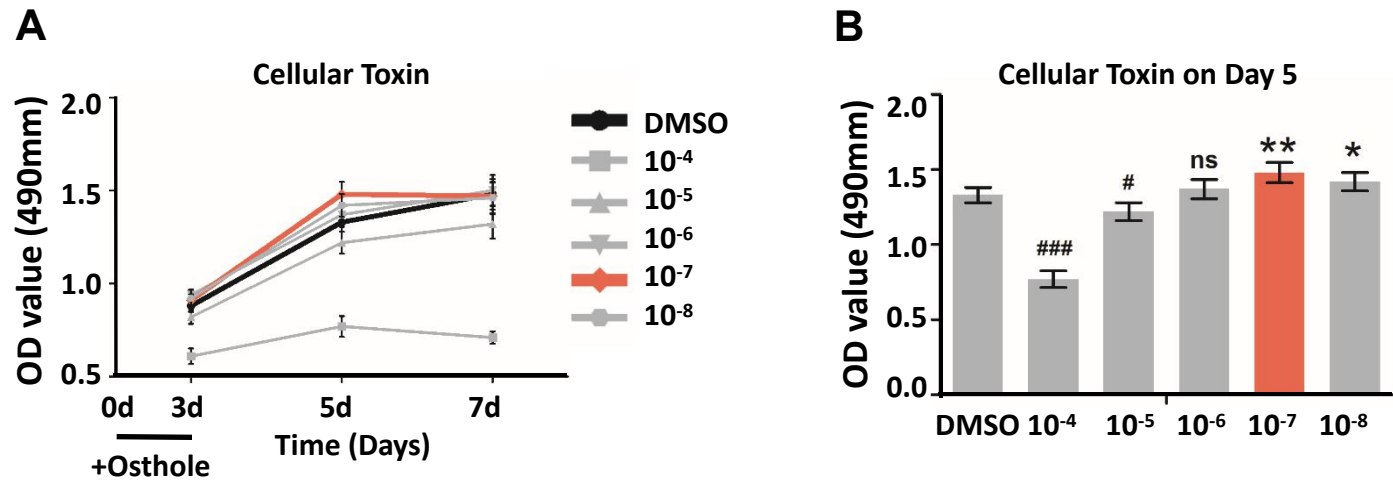

Supplementary figure 3

Proliferation of P-PDLSCs after Osthole treatment. (A) MTT assay of P-PDLSCs with different concentrations of Osthole (0 Mol/L,  $10^{-4}$  Mol/L,  $10^{-5}$  Mol/L,  $10^{-6}$  Mol/L,  $10^{-7}$  Mol/L and  $10^{-8}$  Mol/L) on day 3, 5 & 7. (B) MTT assay of P-PDLSCs with Osthole treatment of the same concentrations as above on day 5. \*/#:  $P < 0.05$ , \*\*:  $P < 0.01$ , ###:  $P < 0.001$ , ns:  $P \geq 0.05$ ,  $n = 3$ .

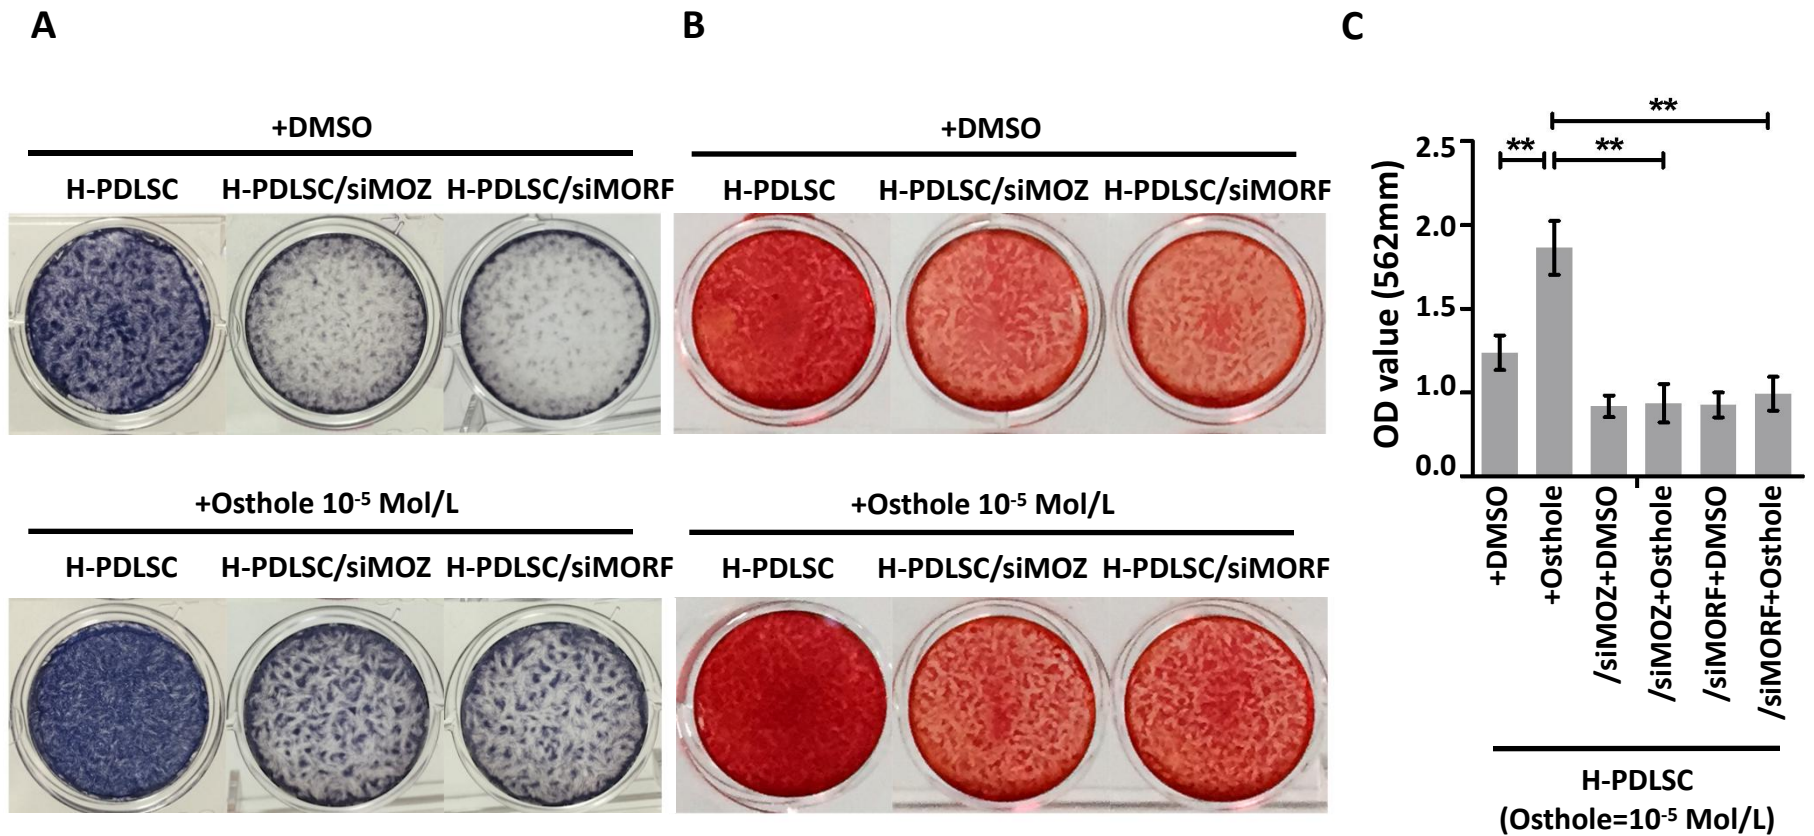

Supplementary figure 4

Osteogenic differentiation of H-PDLSCs/siMOZ or H-PDLSCs/siMORF with 10<sup>-5</sup> Mol/L Osthole. (A) ALP staining in H-PDLSCs with Osthole treatment after 7 days osteogenic induction. (B) ARS staining in H-PDLSCs with Osthole treatment after 21 days osteogenic induction. (C) Quantification for light absorbance at 562 nm. \*\*: P < 0.01, n = 3.
